# Supplementary material for: Nano-Azo Ligand and Its Superhydrophobic Complexes: Synthesis, Characterization, DFT, Contact Angle, Molecular Docking, and Antimicrobial Studies
Source: Hindawi journal article supplement (doi:10.1155/2020/6382037), 2020-10-16
Supplement: f1 [file 6382037.f1.zip]

Archive with 2 entries (2 files):
- 6382037.f1/Supplementary Figures ID 6382037-accepted.doc
- 6382037.f1/Supplementary Tables  ID 6382037-accepted.doc
